# Supplementary material for: Disability and in-hospital breastfeeding practices and supports in Ontario, Canada: a population-based study
Source: PubMed Central journal article supplement (PMC9831273; doi:10.1016/s2468-2667(22)00310-3), 2023-01
Supplement: NIHMS1862585-supplement-1.pdf [file NIHMS1862585-supplement-1.pdf]

# THE LANCET

## Public Health

### Supplementary appendix

This appendix formed part of the original submission and has been peer reviewed.  
We post it as supplied by the authors.

Supplement to: Brown HK, Taylor C, Vigod SN, et al. Disability and in-hospital  
breastfeeding practices and supports in Ontario, Canada: a population-based study.  
*Lancet Public Health* 2023; **8**: e47–56.

**Figure S1. Derivation of the study cohort.**

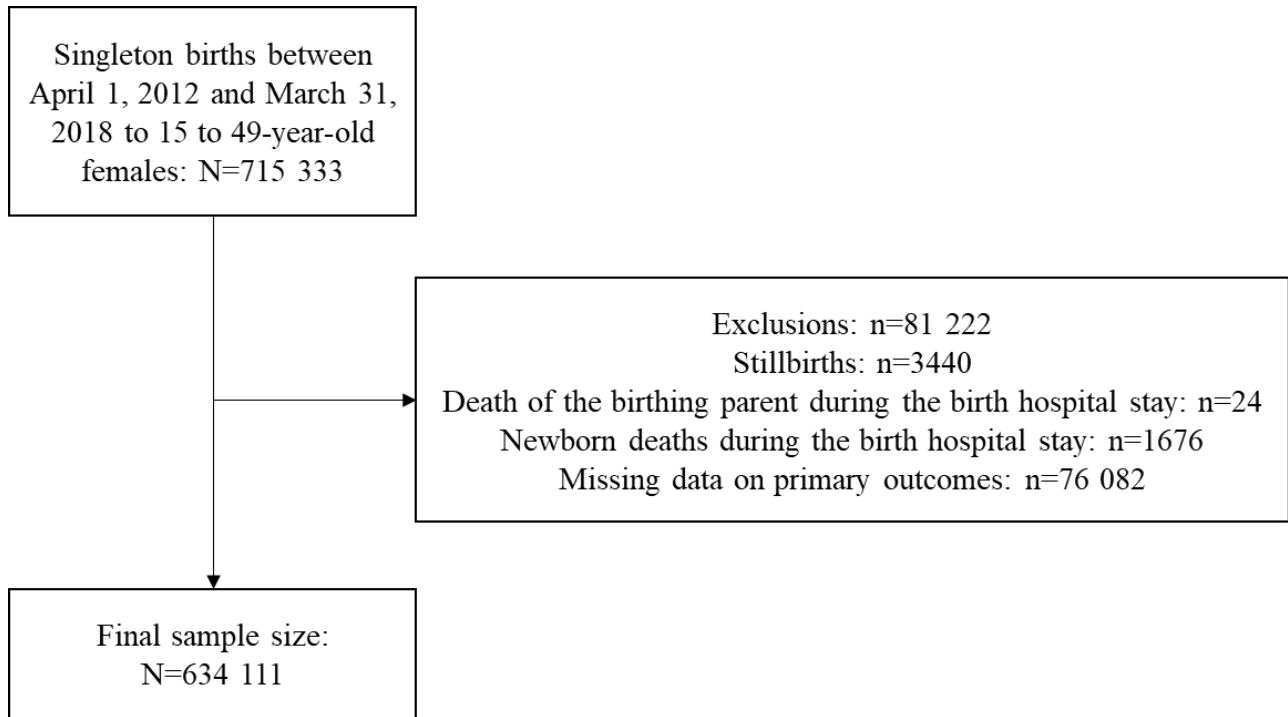

**Table S1. Comparison of people who were included and not included in the cohort because of missing data on the primary outcomes.**

| Variable                             | Included in the cohort | Not included in the cohort | Standardized difference |
|--------------------------------------|------------------------|----------------------------|-------------------------|
|                                      | n=634 111              | n=76 082                   |                         |
| Age, years                           |                        |                            |                         |
| 15-24                                | 22 218 (3.5)           | 1743 (2.3)                 | 0.07                    |
| 25-34                                | 494 845 (78.0)         | 54 960 (72.2)              | 0.13                    |
| 35-49                                | 117 048 (18.5)         | 19 379 (25.5)              | 0.17                    |
| Multiparous                          | 364 550 (57.5)         | 41 502 (54.5)              | 0.06                    |
| Neighbourhood income quintile (Q)    |                        |                            |                         |
| Q1 (lowest)                          | 140 309 (22.1)         | 14 051 (18.5)              | 0.09                    |
| Q2                                   | 127 459 (20.1)         | 14 683 (19.3)              | 0.02                    |
| Q3                                   | 129 733 (20.5)         | 16 015 (21.0)              | 0.01                    |
| Q4                                   | 131 829 (20.8)         | 16 787 (22.1)              | 0.03                    |
| Q5 (highest)                         | 102 657 (16.2)         | 14 267 (18.8)              | 0.07                    |
| Missing                              | 2124 (0.3)             | 279 (0.4)                  | 0.01                    |
| Rural region of residence            | 29 773 (4.7)           | 1387 (1.8)                 | 0.16                    |
| Stable chronic conditions            | 142 979 (22.5)         | 20 848 (27.4)              | 0.11                    |
| Unstable chronic conditions          | 80 456 (12.7)          | 11 563 (15.2)              | 0.07                    |
| Mental illness                       | 237 819 (37.5)         | 28 620 (37.6)              | 0.00                    |
| Substance use disorder               | 26 613 (4.2)           | 2414 (3.2)                 | 0.05                    |
| Prenatal smoking                     | 69 235 (10.9)          | 4663 (6.1)                 | 0.17                    |
| Pre-pregnancy overweight or obesity  | 250 732 (39.5)         | 23 363 (30.7)              | 0.19                    |
| Type of prenatal care provider       |                        |                            |                         |
| Family physician                     | 96 606 (15.2)          | 7935 (10.4)                | 0.14                    |
| Obstetrician                         | 223 894 (35.3)         | 35 145 (46.2)              | 0.22                    |
| Shared care                          | 260 497 (41.1)         | 31 743 (41.7)              | 0.01                    |
| Midwife                              | 7073 (1.1)             | 145 (0.2)                  | 0.12                    |
| None                                 | 46 041 (7.3)           | 1114 (1.5)                 | 0.29                    |
| Number of prenatal care visits       |                        |                            |                         |
| ≤ 10                                 | 144 617 (22.8)         | 7662 (10.1)                | 0.35                    |
| 11-14                                | 171 795 (27.1)         | 19 500 (25.6)              | 0.03                    |
| ≥ 15                                 | 317 699 (50.1)         | 48 920 (64.3)              | 0.29                    |
| Prenatal class attendance            | 142 879 (22.5)         | 15 929 (20.9)              | 0.04                    |
| Intention to breastfeed              | 565 051 (89.1)         | 51 581 (67.8)              | 0.54                    |
| Caesarean delivery                   | 171 642 (27.1)         | 25 603 (33.7)              | 0.14                    |
| Severe maternal morbidity            | 12 439 (2.0)           | 1975 (2.6)                 | 0.04                    |
| Preterm birth < 37 weeks             | 37 711 (5.9)           | 5869 (7.7)                 | 0.07                    |
| NICU admission                       | 73 617 (11.6)          | 10 011 (13.2)              | 0.05                    |
| Newborn discharge to social services | 2499 (0.4)             | 255 (0.3)                  | 0.01                    |

**Table S2. Conceptualization of study covariates.**

| Variable                            | Definition                                                                                                                                                                                                                                                                                                                                                                                                                                                                                                                                                                                    | Categories for analysis                                           | Data source(s)           |
|-------------------------------------|-----------------------------------------------------------------------------------------------------------------------------------------------------------------------------------------------------------------------------------------------------------------------------------------------------------------------------------------------------------------------------------------------------------------------------------------------------------------------------------------------------------------------------------------------------------------------------------------------|-------------------------------------------------------------------|--------------------------|
| Age                                 | Age at conception                                                                                                                                                                                                                                                                                                                                                                                                                                                                                                                                                                             | 15-24, 25-34, 35-49 years                                         | RPDB                     |
| Parity                              | Number of prior livebirths or stillbirths                                                                                                                                                                                                                                                                                                                                                                                                                                                                                                                                                     | Primiparous, multiparous                                          | MOMBABY                  |
| Neighbourhood income quintile       | Dissemination area-level median income at conception                                                                                                                                                                                                                                                                                                                                                                                                                                                                                                                                          | Q1 (lowest), Q2, Q3, Q4, Q5 (highest)                             | RPDB, linked with Census |
| Rural residence                     | Area of residence at conception, calculated based on sum of indicators related to travel time to nearest basic referral centre, travel time to nearest advanced referral centre, community population size, number of active general practitioners, population to general practitioner ratio, presence of a hospital, availability of ambulance services, social indicators (e.g., no airport, university, or community college), weather conditions (e.g., extreme rainfall, snowfall, or cold temperature), and selected services (e.g., anesthetic and obstetrical services) <sup>25</sup> | Rural, urban                                                      | RPDB                     |
| Chronic conditions                  | Johns Hopkins Adjusted Clinical Groups® System version 10 collapsed ambulatory diagnostic groups, classified as stable or unstable conditions in the 2 years before conception, the latter defined based on likelihood of complications and need for resources such as specialty care <sup>26</sup>                                                                                                                                                                                                                                                                                           | Present, absent (for both stable and unstable chronic conditions) | DAD, OHIP, OMHRS, NACRS  |
| Mental illness                      | Psychotic, mood or anxiety, or other mental disorders in the 2 years before conception                                                                                                                                                                                                                                                                                                                                                                                                                                                                                                        | Present, absent                                                   | DAD, OHIP, OMHRS, NACRS  |
| Substance use disorder              | Alcohol or illicit substance use disorder in the 2 years before conception                                                                                                                                                                                                                                                                                                                                                                                                                                                                                                                    | Present, absent                                                   | DAD, OHIP, OMHRS, NACRS  |
| Smoking in pregnancy                | Self-reported amount of smoking per day at time of first prenatal visit or birth hospital admission                                                                                                                                                                                                                                                                                                                                                                                                                                                                                           | Smoking, no smoking                                               | BORN                     |
| Overweight/obesity                  | Maternal BMI, based on self-reported weight prior to pregnancy                                                                                                                                                                                                                                                                                                                                                                                                                                                                                                                                | Obese/overweight, not obese/overweight                            | BORN                     |
| Type of prenatal care provider      | Health care provider delivering the majority of prenatal care (75%)                                                                                                                                                                                                                                                                                                                                                                                                                                                                                                                           | Family physician, obstetrician, midwife, shared care, none        | BORN, OHIP               |
| Number of prenatal care visits      | Number of visits to a family physician, obstetrician, or midwife during pregnancy for antenatal care                                                                                                                                                                                                                                                                                                                                                                                                                                                                                          | ≤ 10, 11-14, ≥ 15                                                 | BORN, OHIP               |
| Prenatal class attendance           | Attendance of any prenatal classes during pregnancy, including online education requiring registration or enrollment as well as in-person classes (not including prenatal education during routine antenatal care visits)                                                                                                                                                                                                                                                                                                                                                                     | Present, absent                                                   | BORN                     |
| Intention to breastfeed             | Parent intends to feed infant breastmilk, regardless of the method of feeding, as self-reported during pregnancy or at the time of birth                                                                                                                                                                                                                                                                                                                                                                                                                                                      | Intending, not intending                                          | BORN                     |
| Caesarean section                   | Delivery via elective or emergency caesarean section                                                                                                                                                                                                                                                                                                                                                                                                                                                                                                                                          | Caesarean, vaginal                                                | MOMBABY                  |
| Severe maternal morbidity           | Serious obstetric morbidity in pregnancy or during the birth hospital stay                                                                                                                                                                                                                                                                                                                                                                                                                                                                                                                    | Present, absent                                                   | DAD, MOMBABY             |
| Preterm birth                       | Preterm birth at less than 37 weeks gestational age                                                                                                                                                                                                                                                                                                                                                                                                                                                                                                                                           | Preterm, term                                                     | MOMBABY                  |
| NICU admission                      | Admission of the newborn to a neonatal intensive care unit during the birth hospital stay                                                                                                                                                                                                                                                                                                                                                                                                                                                                                                     | Admitted, not admitted                                            | MOMBABY                  |
| Infant discharge to social services | Infant discharged to social services (i.e., child welfare) after the birth hospital stay based on discharge location information                                                                                                                                                                                                                                                                                                                                                                                                                                                              | Discharged to social services, not discharged to social services  | MOMBABY                  |

Abbreviations: BORN = Better Outcomes Registry & Network; DAD = Discharge Abstract Database; OHIP = Ontario Health Insurance Plan database; OMHRS = Ontario Mental Health Reporting System; NACRS = National Ambulatory Care Reporting System; RPDB = Registered Persons Database.

**Figure S2. Conceptualization of study variables.**

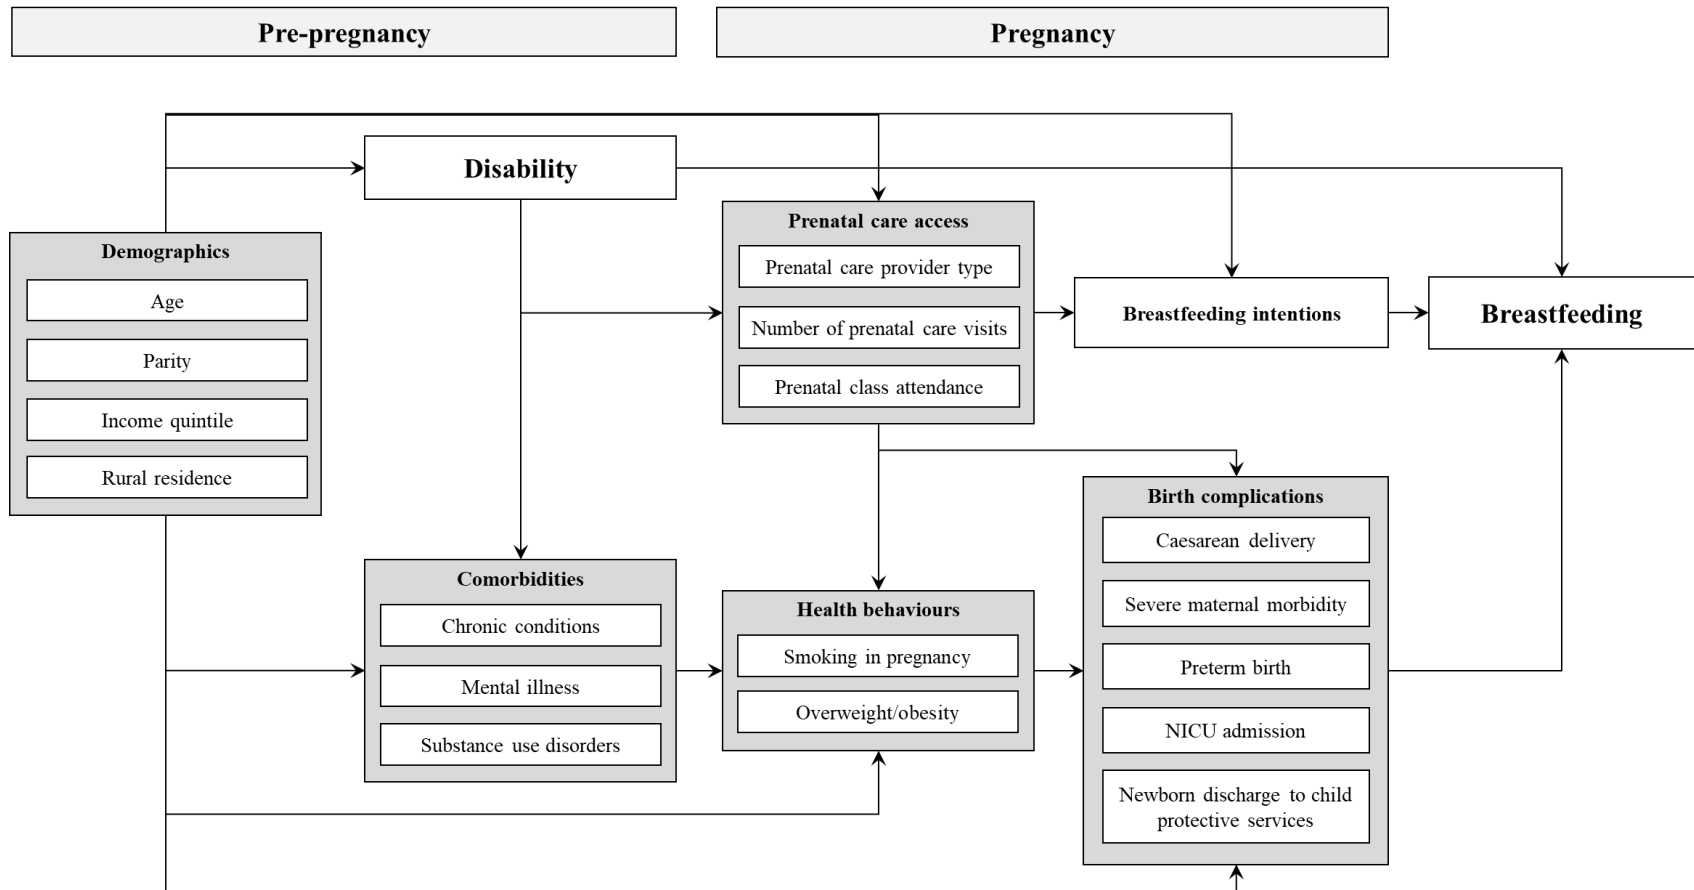

**Table S3. Breastfeeding practices and receipt of supports that promote exclusive breastfeeding during the birth hospital stay, in people with a disability, compared to those without any recognized disability, by specific disability subtype.**

| <b>Disability type</b>                              | <b>Number (%) with outcome</b> | <b>Unadjusted RR (95% CI)</b> | <b>Adjusted RR (95% CI)<sup>a</sup></b> | <b>Adjusted RR (95% CI)<sup>b</sup></b> | <b>Adjusted RR (95% CI)<sup>c</sup></b> |
|-----------------------------------------------------|--------------------------------|-------------------------------|-----------------------------------------|-----------------------------------------|-----------------------------------------|
| <b>Opportunity to latch within 2 hours of birth</b> |                                |                               |                                         |                                         |                                         |
| No disability (n=555 310)                           | 305 882 (55.1)                 | 1.00 (Referent)               | 1.00 (Referent)                         | 1.00 (Referent)                         | 1.00 (Referent)                         |
| Physical - Musculoskeletal only (n=23 414)          | 12 912 (55.1)                  | 1.00 (0.99-1.01)              | 1.00 (0.99-1.01)                        | 1.00 (0.99-1.01)                        | 1.01 (0.99-1.03)                        |
| Physical - Neurological only n=13 643)              | 7173 (52.6)                    | 0.96 (0.94-0.97)              | 0.96 (0.94-0.98)                        | 0.97 (0.96-0.99)                        | 0.99 (0.96-1.01)                        |
| Physical - Permanent injury only (n=8594)           | 4705 (54.7)                    | 0.99 (0.98-1.02)              | 1.00 (0.98-1.02)                        | 1.01 (0.99-1.03)                        | 1.01 (0.98-1.04)                        |
| Physical - Congenital anomalies only (n=4584)       | 2462 (53.7)                    | 0.98 (0.95-1.00)              | 0.98 (0.96-1.01)                        | 0.99 (0.96-1.02)                        | 0.99 (0.95-1.03)                        |
| Physical - Multiple (n=4241)                        | 2153 (50.8)                    | 0.92 (0.89-0.95)              | 0.92 (0.89-0.95)                        | 0.94 (0.91-0.97)                        | 0.95 (0.91-1.00)                        |
| Sensory - Hearing loss only (n=13 869)              | 7604 (54.8)                    | 1.00 (0.98-1.01)              | 1.00 (0.98-1.01)                        | 1.00 (0.99-1.02)                        | 1.01 (0.98-1.03)                        |
| Sensory - Vision only (n=5162)                      | 2777 (53.8)                    | 0.98 (0.95-1.00)              | 0.98 (0.95-1.00)                        | 0.98 (0.96-1.01)                        | 0.99 (0.95-1.02)                        |
| Sensory - Multiple (n=196)                          | 118 (60.2)                     | 1.09 (0.97-1.23)              | 1.09 (0.97-1.23)                        | 1.10 (0.98-1.24)                        | 1.10 (0.92-1.32)                        |
| IDD - Autism only (n=220)                           | 121 (55.0)                     | 1.00 (0.88-1.12)              | 1.02 (0.91-1.15)                        | 1.06 (0.94-1.19)                        | 1.07 (0.89-1.28)                        |
| IDD - Other IDD only (n=775)                        | 306 (39.5)                     | 0.72 (0.66-0.79)              | 0.73 (0.66-0.79)                        | 0.76 (0.69-0.83)                        | 0.77 (0.69-0.87)                        |
| IDD - Multiple (n=53)                               | 20 (37.7)                      | 0.67 (0.46-0.96)              | 0.70 (0.49-1.00)                        | 0.76 (0.53-1.08)                        | 0.81 (0.52-1.25)                        |
| Multiple - Physical + sensory (n=3516)              | 1814 (51.6)                    | 0.94 (0.91-0.97)              | 0.94 (0.91-0.97)                        | 0.96 (0.93-0.99)                        | 0.97 (0.93-1.02)                        |
| Multiple - Physical + IDD (n=340)                   | 130 (38.2)                     | 0.69 (0.60-0.80)              | 0.69 (0.60-0.80)                        | 0.73 (0.64-0.84)                        | 0.76 (0.64-0.91)                        |
| Multiple - Sensory + IDD (n=117)                    | 56 (47.9)                      | 0.88 (0.72-1.08)              | 0.91 (0.75-1.11)                        | 0.96 (0.79-1.16)                        | 0.97 (0.75-1.27)                        |
| Multiple - All three types (n=77)                   | 27 (35.1)                      | 0.64 (0.47-0.88)              | 0.64 (0.47-0.88)                        | 0.68 (0.50-0.92)                        | 0.71 (0.48-1.03)                        |
| <b>Any breastfeeding before discharge</b>           |                                |                               |                                         |                                         |                                         |
| No disability (n=555 310)                           | 482 702 (86.9)                 | 1.00 (Referent)               | 1.00 (Referent)                         | 1.00 (Referent)                         | 1.00 (Referent)                         |
| Physical - Musculoskeletal only (n=23 414)          | 20 105 (85.9)                  | 0.99 (0.98-0.99)              | 0.98 (0.98-0.99)                        | 0.99 (0.98-0.99)                        | 0.99 (0.98-1.01)                        |
| Physical - Neurological only n=13 643)              | 11 227 (82.3)                  | 0.95 (0.94-0.96)              | 0.95 (0.94-0.96)                        | 0.96 (0.95-0.97)                        | 0.97 (0.95-0.99)                        |
| Physical - Permanent injury only (n=8594)           | 7240 (84.2)                    | 0.97 (0.96-0.98)              | 0.98 (0.97-0.99)                        | 0.99 (0.98-1.00)                        | 1.00 (0.97-1.02)                        |
| Physical - Congenital anomalies only (n=4584)       | 3840 (83.8)                    | 0.97 (0.95-0.98)              | 0.98 (0.96-0.99)                        | 0.98 (0.97-0.99)                        | 0.99 (0.95-1.02)                        |
| Physical - Multiple (n=4241)                        | 3469 (81.8)                    | 0.94 (0.92-0.95)              | 0.94 (0.93-0.95)                        | 0.96 (0.94-0.97)                        | 0.97 (0.94-1.00)                        |
| Sensory - Hearing loss only (n=13 869)              | 11 644 (84.0)                  | 0.97 (0.96-0.97)              | 0.97 (0.96-0.98)                        | 0.97 (0.97-0.98)                        | 0.98 (0.96-1.00)                        |
| Sensory - Vision only (n=5162)                      | 4465 (86.5)                    | 0.99 (0.98-1.01)              | 0.99 (0.98-1.00)                        | 0.99 (0.98-1.00)                        | 0.99 (0.96-1.02)                        |
| Sensory - Multiple (n=196)                          | 170 (86.7)                     | 0.99 (0.94-1.05)              | 0.99 (0.93-1.05)                        | 1.00 (0.94-1.06)                        | 1.00 (0.86-1.16)                        |
| IDD - Autism only (n=220)                           | 175 (79.5)                     | 0.91 (0.84-0.98)              | 0.93 (0.86-1.00)                        | 0.95 (0.89-1.03)                        | 0.96 (0.83-1.12)                        |
| IDD - Other IDD only (n=775)                        | 534 (68.9)                     | 0.80 (0.76-0.84)              | 0.81 (0.77-0.85)                        | 0.84 (0.80-0.88)                        | 0.85 (0.78-0.93)                        |
| IDD - Multiple (n=53)                               | 22 (41.5)                      | 0.47 (0.34-0.66)              | 0.50 (0.36-0.68)                        | 0.53 (0.38-0.73)                        | 0.56 (0.37-0.85)                        |
| Multiple - Physical + sensory (n=3516)              | 2858 (81.3)                    | 0.94 (0.92-0.96)              | 0.94 (0.93-0.96)                        | 0.96 (0.94-0.97)                        | 0.96 (0.93-1.00)                        |
| Multiple - Physical + IDD (n=340)                   | 219 (64.4)                     | 0.74 (0.68-0.81)              | 0.75 (0.69-0.82)                        | 0.78 (0.72-0.85)                        | 0.81 (0.71-0.92)                        |
| Multiple - Sensory + IDD (n=117)                    | 74 (63.2)                      | 0.74 (0.64-0.86)              | 0.75 (0.65-0.87)                        | 0.78 (0.67-0.90)                        | 0.79 (0.63-1.00)                        |
| Multiple - All three types (n=77)                   | 36 (46.8)                      | 0.58 (0.45-0.74)              | 0.58 (0.46-0.75)                        | 0.61 (0.48-0.78)                        | 0.63 (0.45-0.87)                        |
| <b>Exclusive breastfeeding before discharge</b>     |                                |                               |                                         |                                         |                                         |
| No disability (n=555 310)                           | 327 981 (59.1)                 | 1.00 (Referent)               | 1.00 (Referent)                         | 1.00 (Referent)                         | 1.00 (Referent)                         |
| Physical - Musculoskeletal only (n=23 414)          | 13 868 (59.2)                  | 1.00 (0.99-1.01)              | 1.00 (0.99-1.01)                        | 1.01 (1.00-1.02)                        | 1.03 (1.01-1.04)                        |

| <b>Disability type</b>                                                                          | <b>Number (%) with outcome</b> | <b>Unadjusted RR (95% CI)</b> | <b>Adjusted RR (95% CI)<sup>a</sup></b> | <b>Adjusted RR (95% CI)<sup>b</sup></b> | <b>Adjusted RR (95% CI)<sup>c</sup></b> |
|-------------------------------------------------------------------------------------------------|--------------------------------|-------------------------------|-----------------------------------------|-----------------------------------------|-----------------------------------------|
| Physical - Neurological only (n=13 643)                                                         | 7579 (55.6)                    | 0.95 (0.93-0.96)              | 0.95 (0.93-0.96)                        | 0.97 (0.95-0.98)                        | 0.99 (0.97-1.01)                        |
| Physical - Permanent injury only (n=8594)                                                       | 5165 (60.1)                    | 1.02 (1.00-1.04)              | 1.02 (1.00-1.04)                        | 1.03 (1.01-1.05)                        | 1.04 (1.01-1.06)                        |
| Physical - Congenital anomalies only (n=4584)                                                   | 2675 (58.4)                    | 0.99 (0.97-1.02)              | 0.99 (0.97-1.02)                        | 1.00 (0.97-1.02)                        | 1.00 (0.96-1.04)                        |
| Physical - Multiple (n=4241)                                                                    | 2309 (54.4)                    | 0.92 (0.89-0.95)              | 0.92 (0.90-0.95)                        | 0.95 (0.92-0.98)                        | 0.98 (0.94-1.03)                        |
| Sensory - Hearing loss only (n=13 869)                                                          | 8132 (58.6)                    | 0.99 (0.98-1.01)              | 0.99 (0.98-1.01)                        | 1.00 (0.98-1.02)                        | 1.00 (0.98-1.03)                        |
| Sensory - Vision only (n=5162)                                                                  | 2900 (56.2)                    | 0.95 (0.92-0.97)              | 0.95 (0.93-0.98)                        | 0.96 (0.94-0.99)                        | 0.97 (0.94-1.01)                        |
| Sensory - Multiple (n=196)                                                                      | 114 (58.2)                     | 1.00 (0.88-1.13)              | 0.99 (0.88-1.12)                        | 1.01 (0.89-1.14)                        | 1.01 (0.84-1.22)                        |
| IDD - Autism only (n=220)                                                                       | 94 (42.7)                      | 0.71 (0.61-0.84)              | 0.71 (0.61-0.84)                        | 0.75 (0.64-0.88)                        | 0.77 (0.63-0.95)                        |
| IDD - Other IDD only (n=775)                                                                    | 310 (40.0)                     | 0.70 (0.64-0.76)              | 0.70 (0.64-0.76)                        | 0.74 (0.68-0.81)                        | 0.76 (0.68-0.85)                        |
| IDD - Multiple (n=53)                                                                           | 10 (18.9)                      | 0.35 (0.20-0.61)              | 0.35 (0.20-0.62)                        | 0.40 (0.23-0.70)                        | 0.43 (0.23-0.80)                        |
| Multiple - Physical + sensory (n=3516)                                                          | 1877 (53.4)                    | 0.91 (0.88-0.94)              | 0.91 (0.88-0.94)                        | 0.94 (0.91-0.97)                        | 0.96 (0.92-1.01)                        |
| Multiple - Physical + IDD (n=340)                                                               | 128 (37.6)                     | 0.64 (0.55-0.74)              | 0.64 (0.55-0.74)                        | 0.69 (0.59-0.80)                        | 0.73 (0.61-0.87)                        |
| Multiple - Sensory + IDD (n=117)                                                                | 42 (35.9)                      | 0.64 (0.50-0.82)              | 0.64 (0.49-0.82)                        | 0.68 (0.53-0.88)                        | 0.69 (0.51-0.94)                        |
| Multiple - All three types (n=77)                                                               | 18 (23.4)                      | 0.43 (0.29-0.64)              | 0.43 (0.28-0.64)                        | 0.46 (0.31-0.68)                        | 0.48 (0.30-0.77)                        |
| <b>Skin-to-skin contact with the birthing parent within 2 hours of birth</b>                    |                                |                               |                                         |                                         |                                         |
| No disability (n=555 310)                                                                       | 430 762 (77.6)                 | 1.00 (Referent)               | 1.00 (Referent)                         | 1.00 (Referent)                         | 1.00 (Referent)                         |
| Physical - Musculoskeletal only (n=23 414)                                                      | 18 053 (77.1)                  | 0.99 (0.99-1.00)              | 1.00 (0.99-1.00)                        | 1.00 (0.99-1.01)                        | 1.00 (0.99-1.02)                        |
| Physical - Neurological only (n=13 643)                                                         | 10 233 (75.0)                  | 0.97 (0.96-0.98)              | 0.97 (0.96-0.98)                        | 0.98 (0.97-0.99)                        | 0.98 (0.96-1.00)                        |
| Physical - Permanent injury only (n=8594)                                                       | 6684 (77.8)                    | 1.00 (0.99-1.02)              | 1.00 (0.99-1.02)                        | 1.01 (0.99-1.02)                        | 1.01 (0.98-1.03)                        |
| Physical - Congenital anomalies only (n=4584)                                                   | 3489 (76.1)                    | 0.98 (0.96-1.00)              | 0.98 (0.96-0.99)                        | 0.98 (0.96-0.99)                        | 0.98 (0.95-1.01)                        |
| Physical - Multiple (n=4241)                                                                    | 3087 (72.8)                    | 0.94 (0.92-0.96)              | 0.94 (0.92-0.96)                        | 0.95 (0.93-0.97)                        | 0.96 (0.92-0.99)                        |
| Sensory - Hearing loss only (n=13 869)                                                          | 10 586 (76.3)                  | 0.98 (0.97-0.99)              | 0.98 (0.97-0.99)                        | 0.98 (0.97-0.99)                        | 0.99 (0.97-1.01)                        |
| Sensory - Vision only (n=5162)                                                                  | 3870 (75.0)                    | 0.97 (0.95-0.98)              | 0.97 (0.95-0.98)                        | 0.97 (0.96-0.99)                        | 0.97 (0.94-1.01)                        |
| Sensory - Multiple (n=196)                                                                      | 144 (73.5)                     | 0.95 (0.87-1.03)              | 0.94 (0.86-1.03)                        | 0.95 (0.87-1.03)                        | 0.95 (0.80-1.12)                        |
| IDD - Autism only (n=220)                                                                       | 159 (72.3)                     | 0.93 (0.86-1.01)              | 0.94 (0.86-1.02)                        | 0.95 (0.88-1.03)                        | 0.95 (0.81-1.11)                        |
| IDD - Other IDD only (n=775)                                                                    | 534 (68.9)                     | 0.89 (0.85-0.93)              | 0.89 (0.84-0.93)                        | 0.90 (0.86-0.95)                        | 0.91 (0.83-0.99)                        |
| IDD - Multiple (n=53)                                                                           | 27 (50.9)                      | 0.65 (0.50-0.85)              | 0.64 (0.49-0.85)                        | 0.67 (0.51-0.88)                        | 0.69 (0.47-1.01)                        |
| Multiple - Physical + sensory (n=3516)                                                          | 2560 (72.8)                    | 0.94 (0.92-0.96)              | 0.94 (0.92-0.96)                        | 0.95 (0.93-0.97)                        | 0.96 (0.92-0.99)                        |
| Multiple - Physical + IDD (n=340)                                                               | 213 (62.6)                     | 0.81 (0.74-0.88)              | 0.80 (0.73-0.87)                        | 0.82 (0.75-0.89)                        | 0.83 (0.72-0.95)                        |
| Multiple - Sensory + IDD (n=117)                                                                | 72 (61.5)                      | 0.80 (0.69-0.93)              | 0.82 (0.71-0.94)                        | 0.83 (0.72-0.96)                        | 0.84 (0.67-1.06)                        |
| Multiple - All three types (n=77)                                                               | 41 (53.2)                      | 0.70 (0.56-0.86)              | 0.69 (0.56-0.86)                        | 0.71 (0.57-0.88)                        | 0.72 (0.53-0.98)                        |
| <b>Provision of assistance with breastfeeding within 6 hours of birth after initial feeding</b> |                                |                               |                                         |                                         |                                         |
| No disability (n=555 310)                                                                       | 297 278 (53.5)                 | 1.00 (Referent)               | 1.00 (Referent)                         | 1.00 (Referent)                         | 1.00 (Referent)                         |
| Physical - Musculoskeletal only (n=23 414)                                                      | 12 512 (53.4)                  | 1.00 (0.99-1.01)              | 1.00 (0.99-1.01)                        | 1.00 (0.99-1.02)                        | 1.01 (0.99-1.03)                        |
| Physical - Neurological only (n=13 643)                                                         | 6914 (50.7)                    | 0.96 (0.94-0.97)              | 0.96 (0.94-0.97)                        | 0.97 (0.95-0.98)                        | 0.98 (0.96-1.00)                        |
| Physical - Permanent injury only (n=8594)                                                       | 4704 (54.7)                    | 1.02 (1.00-1.04)              | 1.02 (1.00-1.04)                        | 1.02 (1.01-1.04)                        | 1.03 (1.00-1.06)                        |
| Physical - Congenital anomalies only (n=4584)                                                   | 2387 (52.1)                    | 0.97 (0.95-1.00)              | 0.97 (0.95-1.00)                        | 0.98 (0.95-1.00)                        | 0.98 (0.94-1.02)                        |
| Physical - Multiple (n=4241)                                                                    | 2155 (50.8)                    | 0.96 (0.93-0.99)              | 0.96 (0.93-0.99)                        | 0.97 (0.94-1.00)                        | 0.99 (0.95-1.03)                        |
| Sensory - Hearing loss only (n=13 869)                                                          | 7354 (53.0)                    | 0.99 (0.98-1.01)              | 0.99 (0.98-1.01)                        | 1.00 (0.98-1.01)                        | 1.00 (0.98-1.02)                        |

| <b>Disability type</b>                 | <b>Number (%) with outcome</b> | <b>Unadjusted RR (95% CI)</b> | <b>Adjusted RR (95% CI)<sup>a</sup></b> | <b>Adjusted RR (95% CI)<sup>b</sup></b> | <b>Adjusted RR (95% CI)<sup>c</sup></b> |
|----------------------------------------|--------------------------------|-------------------------------|-----------------------------------------|-----------------------------------------|-----------------------------------------|
| Sensory - Vision only (n=5162)         | 2735 (53.0)                    | 0.99 (0.97-1.02)              | 0.99 (0.97-1.02)                        | 0.99 (0.97-1.02)                        | 1.00 (0.96-1.04)                        |
| Sensory - Multiple (n=196)             | 107 (54.6)                     | 0.96 (0.85-1.09)              | 0.95 (0.83-1.08)                        | 0.96 (0.84-1.09)                        | 0.96 (0.79-1.16)                        |
| IDD - Autism only (n=220)              | 109 (49.5)                     | 0.92 (0.80-1.04)              | 0.92 (0.81-1.05)                        | 0.95 (0.84-1.08)                        | 0.96 (0.79-1.16)                        |
| IDD - Other IDD only (n=775)           | 334 (43.1)                     | 0.82 (0.75-0.89)              | 0.81 (0.75-0.88)                        | 0.84 (0.78-0.91)                        | 0.86 (0.77-0.96)                        |
| IDD - Multiple (n=53)                  | 14 (26.4)                      | 0.49 (0.31-0.78)              | 0.51 (0.33-0.80)                        | 0.55 (0.35-0.86)                        | 0.57 (0.34-0.96)                        |
| Multiple - Physical + sensory (n=3516) | 1802 (51.3)                    | 0.97 (0.94-1.00)              | 0.97 (0.94-1.00)                        | 0.98 (0.95-1.01)                        | 0.99 (0.95-1.04)                        |
| Multiple - Physical + IDD (n=340)      | 124 (36.5)                     | 0.70 (0.61-0.81)              | 0.72 (0.62-0.82)                        | 0.75 (0.65-0.85)                        | 0.77 (0.65-0.92)                        |
| Multiple - Sensory + IDD (n=117)       | 45 (38.5)                      | 0.72 (0.56-0.91)              | 0.72 (0.57-0.92)                        | 0.75 (0.59-0.95)                        | 0.76 (0.56-1.02)                        |
| Multiple - All three types (n=77)      | 25 (32.5)                      | 0.61 (0.44-0.86)              | 0.61 (0.44-0.86)                        | 0.64 (0.46-0.89)                        | 0.66 (0.45-0.98)                        |

<sup>a</sup> Adjusted for age.

<sup>b</sup> Adjusted for age, parity, neighbourhood income quintile, rural residence, stable and unstable chronic conditions, mental illness, and substance use disorders.

<sup>c</sup> Adjusted for age, parity, neighbourhood income quintile, rural residence, stable and unstable chronic conditions, mental illness, substance use disorders, smoking, overweight/obesity, prenatal care provider type, number of prenatal care visits, and prenatal class attendance.



**Table S4. Reasons for giving fluids other than breastmilk, in people with a disability, compared to those without any recognized disability.<sup>a</sup>**

| Variable <sup>b</sup>             | Physical disability only | Sensory disability only | Intellectual/developmental disability only | Multiple disabilities | No disability  |
|-----------------------------------|--------------------------|-------------------------|--------------------------------------------|-----------------------|----------------|
|                                   | n=17 698                 | n=6191                  | n=437                                      | n=1455                | n=178 772      |
| Maternal medical                  | 407 (2.3)                | 111 (1.8)               | 7 (1.6)                                    | 45 (3.1) <sup>a</sup> | 2738 (1.5)     |
| Infant medical                    | 2546 (14.4)              | 962 (15.5)              | 41 (9.4) <sup>a</sup>                      | 205 (14.1)            | 25 252 (14.1)  |
| Informed parent decision          | 15 375 (86.9)            | 5359 (86.6)             | 377 (86.3)                                 | 1250 (85.9)           | 157 171 (87.9) |
| Birth mother not involved in care | 97 (0.5)                 | 37 (0.6)                | 24 (5.5) <sup>a</sup>                      | 24 (1.6) <sup>a</sup> | 481 (0.3)      |

<sup>a</sup> Analysis restricted to newborns receiving fluids other than breastmilk.

<sup>b</sup> Standardized difference > 0.10, comparing people within each respective disability group to those without a disability.
